# Supplementary material for: Formation, location and beneficial role of PbI2 in lead halide perovskite solar cells
Source: Royal Society of Chemistry journal article supplement (doi:10.1039/c6se00029k), 2017-01-01
Supplement: c6se00029k1.pdf [file c6se00029k1.pdf]

## Formation, location and beneficial role of $\text{PbI}_2$ in lead halide perovskite solar cells

Tian Du<sup>1,2</sup>, Claire H. Burges<sup>1</sup>, Jinhyun Kim<sup>2</sup>, Jiaqi Zhang<sup>1</sup>, James R. Durrant<sup>2</sup>  
and Martyn A. McLachlan<sup>2\*</sup>

<sup>1</sup>Department of Materials and Centre for Plastic Electronics, Imperial College London, SW7 2BP

<sup>2</sup>Department of Chemistry and Centre for Plastic Electronics, Imperial College London, SW7 2AZ

\*martyn.mclachlan@imperial.ac.uk

### Electronic Suuplementary Information

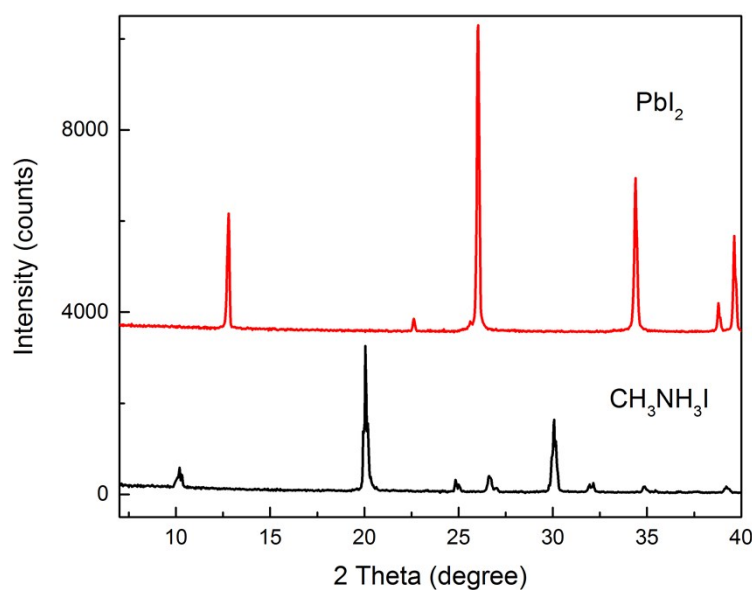

Figure S1 Powder X-ray diffraction patterns of  $\text{PbI}_2$  and  $\text{CH}_3\text{NH}_3\text{I}$ .

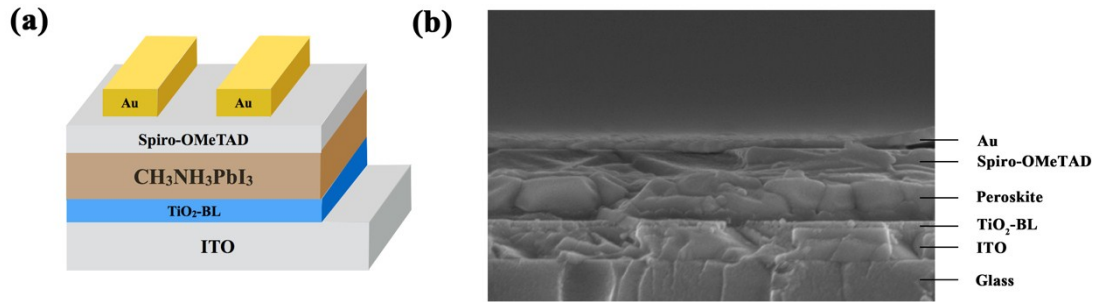

Figure S2 (a) Schematic showing device architecture and (b) the typical cross-sectional SEM image.

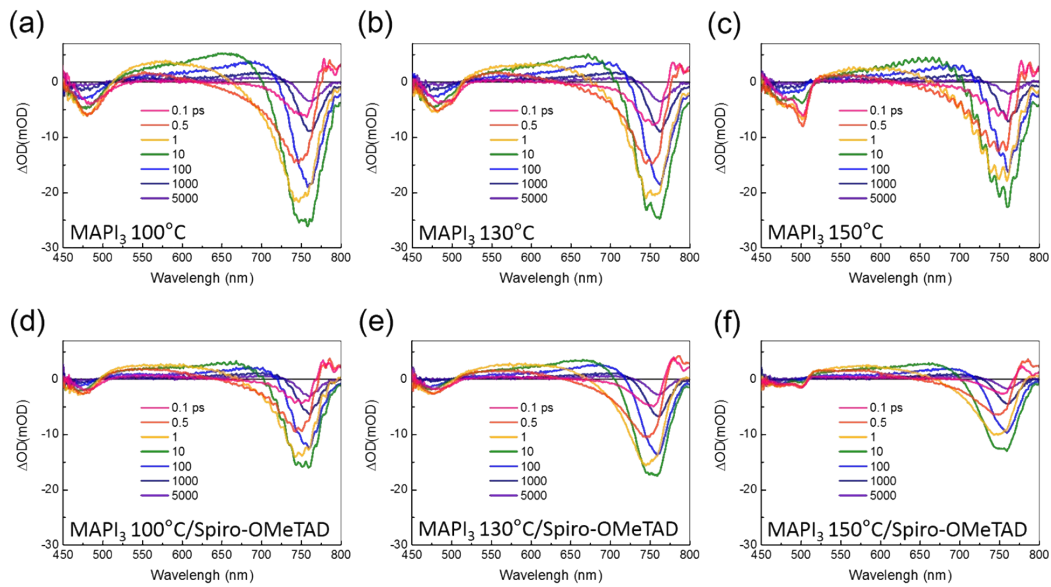

Figure S3 Transient absorption spectrum with excitation at 380nm (flux  $64 \mu\text{J}/\text{cm}^2$ ) of MAPI films on glass with (a-c) and without Spiro-OMeTAD quencher (d-e) after being annealed at the indicated temperatures.

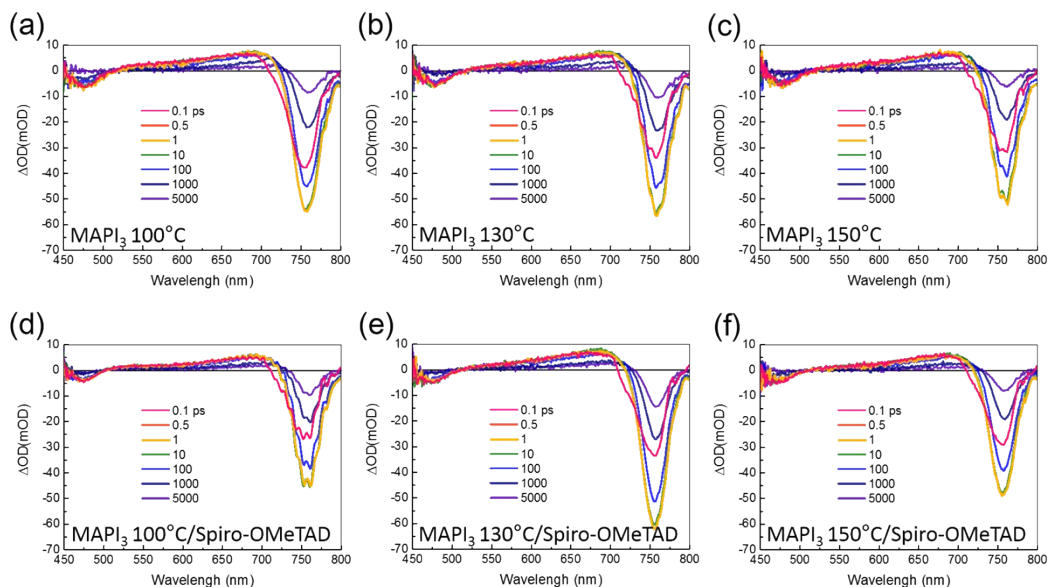

Figure S4 Transient absorption spectrum with excitation at 715 nm (flux  $64 \mu\text{J}/\text{cm}^2$ ) of MAPI films on glass with (a-c) and without Spiro-OMeTAD quencher (d-e) after being annealed at different temperature.

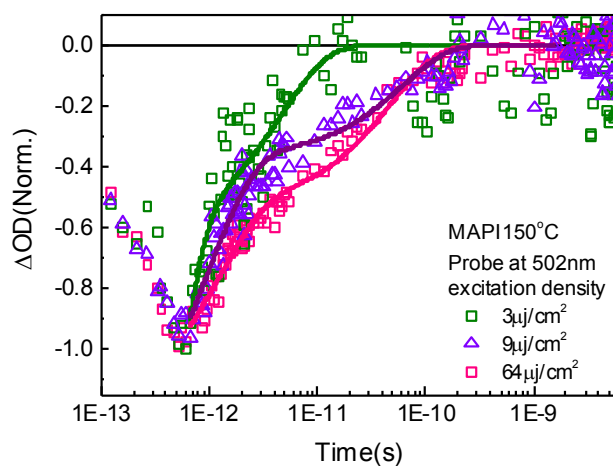

Figure S5 Transient absorption dynamics of 150 °C annealed MAPI films probed at 502 nm, with different excitation density. The symbols are the decays of transient absorption signal, and the solid lines represent double exponential fitting the decays.

Table S1 d-spacings of the lattice planes for MAPI and  $\text{PbI}_2$  measured from XRD patterns and calculated from <sup>1</sup>

| hkl | Material       | $2\theta_{(\text{degrees})}$ | $d_{\text{measured}}$ | $d_{\text{calculated}}$ |
|-----|----------------|------------------------------|-----------------------|-------------------------|
| 001 | $\text{PbI}_2$ | 12.65                        | 0.6997                | 0.6979                  |
| 110 | MAPI           | 14.09                        | 0.6285                | 0.6258                  |
| 112 | MAPI           | 20.01                        | 0.4437                | 0.4450                  |
| 211 | MAPI           | 23.09                        | 0.3852                | 0.3778                  |
| 202 | MAPI           | 24.48                        | 0.3636                | 0.3627                  |
| 101 | $\text{PbI}_2$ | 25.39                        | 0.3508                | 0.3815                  |
| 220 | MAPI           | 28.43                        | 0.3139                | 0.3129                  |
| 310 | MAPI           | 31.84                        | 0.2810                | 0.2800                  |
| 003 | $\text{PbI}_2$ | 39.53                        | 0.2280                | 0.2326                  |

### Supporting references

- 1 N. Onoda-Yamamuro, O. Yamamuro, T. Matsuo and H. Suga, *J. Phys. Chem. Solids*, 1992, **53**, 277–281.
